# Supplementary material for: Occupations and exposure events in acute and subacute irritant-induced asthma
Source: HighWire-hosted journal article supplement (doi:10.1136/oemed-2020-107323), 2021-03-31
Supplement: oemed-2020-107323supp001_data_supplement.pdf [file oemed-2020-107323supp001_data_supplement.pdf]

## Supplemental material

E-Table 1 Causative agents and high-exposure work tasks of patients with irritant-induced occupational asthma.

| Causative agent | Acute<br>N=30<br>number, work tasks/exposure event                                                                                                                                                                                                                                                                                                                                                                                                                                                                                                                                                                                                                                                                                                                                                                                                                  | Subacute<br>N=39<br>number, work tasks/exposure event                                                                                                                                                                                                                                                                                                                                                                                                                                                                                                                                                                                                                                                                                                                                 | Total |
|-----------------|---------------------------------------------------------------------------------------------------------------------------------------------------------------------------------------------------------------------------------------------------------------------------------------------------------------------------------------------------------------------------------------------------------------------------------------------------------------------------------------------------------------------------------------------------------------------------------------------------------------------------------------------------------------------------------------------------------------------------------------------------------------------------------------------------------------------------------------------------------------------|---------------------------------------------------------------------------------------------------------------------------------------------------------------------------------------------------------------------------------------------------------------------------------------------------------------------------------------------------------------------------------------------------------------------------------------------------------------------------------------------------------------------------------------------------------------------------------------------------------------------------------------------------------------------------------------------------------------------------------------------------------------------------------------|-------|
| Acids           | 6<br><u>Sulfuric acid:</u><br>-leak, overwarming and evaporation of battery fluid into truck cabin (truck driver)<br><u>Sulfuric acid, hydrofluoric acid and nitric acid</u><br>-equipment failure causing dissolution of aluminum plates in an electrolysis bath, overheating of bath and evaporation of large volumes of acids (metal worker)<br><u>Hydrochlorid acid</u><br>-rescue task in chemical accident (ambulance worker)<br><u>Hydrochlorid acid and sulfur dioxide</u><br>-process leak in chemical plant (maintenance worker)<br><u>Hydrofluoric acid and nitric acid</u><br>-working above an open hydrofluoric and nitric acid container and cleaning acid dust (crane mechanic)<br><u>Hydrofluoric acid and hydrochloric acid</u><br>-welding of leaking refrigerator unit pipes containing tetrahydrofluoroethane (refrigerating machine mechanic) | 7<br><u>Sulfuric acid and ammonium fluoride</u><br>-washing concrete wall elements using spray detergent (concrete element worker)<br><u>Sulfuric acid and hydrogen sulfide</u><br>-working in metal production plant (machine operator)<br><u>Sulfuric acid, sulfur dioxide and sulfur trioxide</u><br>-working in chemical plant with many process failures (machine operator)<br><u>Hydrochlorid acid</u><br>-washing concrete elements using pressure washer and acid detergent (concrete element worker)<br>-working in hot-zinc coating plant using acid baths for pre-purification, poor ventilation (metal worker)<br><u>Nitric acid fumes</u><br>-disturbances in air-conditioning in electroplating process with electrolysis bath containing nitric acid (2 metal workers) | 13    |
| Bases           | 5<br><u>Ammonia</u><br>-other workers cleaning ammonia tank nearby (electrician)<br>- emission of sludge heap in oil refinery (industrial cleaner)<br>-performing work hygiene measures in a poultry rearing house (occupational hygienist)<br><u>Sodium hydroxide</u><br>-other worker poured sodium hydroxide powder into motor washer whose exhaust line led to patient's breathing zone (aircraft engine mechanics)<br><u>Black lye (in pulp cooking)</u><br>- sodium hydroxide-containing black lye pipe leak in pulp mill (scaffold mechanic)                                                                                                                                                                                                                                                                                                                 | 4<br><u>Ammonia</u><br>-packing broiler meat, leak in cooling system (food worker)<br>-working in cowshed, cleaning sludge lines and basin (farmer)<br><u>Sodium hydroxide</u><br>-repairing output pipe of sodium hydroxide tank in pulp mill, two separate incidents (welder)<br><u>Mixture of alkaline epoxy polyamine hardener and cleaning agent</u><br>-tiling large indoor swimming pool area with poor ventilation (construction worker)                                                                                                                                                                                                                                                                                                                                      | 9     |

|                             |                                                                                                                                                                                                                                                                                                                                                                                                                                                                                                                                                                      |                                                                                                                                                                                                                                                                                                                                                                                |   |
|-----------------------------|----------------------------------------------------------------------------------------------------------------------------------------------------------------------------------------------------------------------------------------------------------------------------------------------------------------------------------------------------------------------------------------------------------------------------------------------------------------------------------------------------------------------------------------------------------------------|--------------------------------------------------------------------------------------------------------------------------------------------------------------------------------------------------------------------------------------------------------------------------------------------------------------------------------------------------------------------------------|---|
| Mixtures of acids and bases |                                                                                                                                                                                                                                                                                                                                                                                                                                                                                                                                                                      | 3<br><u>Ammonia, sulfuric acid, hydrochlorid acid, hydrofluoric acid and nitric acid etc.</u><br>- working in electroplating process with poor ventilation (metal worker)<br>-working in fertilizer plant (industrial cleaner)<br><u>Sodium hydroxide, potassium hydroxide, sulfuric acid, nitric acid, etc.</u><br>-mixing industrial detergents in small workshop (engineer) | 3 |
| Inorganic gases             | 3<br><u>Chlorine dioxide</u><br>- chlorine dioxide bleach leak in pulp mill (3 mechanics)                                                                                                                                                                                                                                                                                                                                                                                                                                                                            | 3<br><u>Chlorine dioxide</u><br>- chlorine dioxide bleach leak in pulp mill (mechanic)<br><u>Chlorine dioxide and hydrogen sulfide</u><br>-repeated leaks in pulp mill (operator)<br><u>Sulfur dioxide</u><br>-testing processes of different copper and nickel smelters abroad (engineer)                                                                                     | 6 |
| Oxidizing agents            | 1<br><u>Ozone</u><br>-working in private apartment with ongoing air ozonation (electrician)                                                                                                                                                                                                                                                                                                                                                                                                                                                                          | 1<br><u>Hydrogen peroxide</u><br>-working in pudding factory with poor ventilation and where hydrogen peroxide was excessively used for disinfecting lines (food machine operator)                                                                                                                                                                                             | 2 |
| Other chemicals             | 5<br><u>Formaldehyde</u><br>-when cleaning, 4 liters of 38% formaldehyde solution spilled from broken fish specimen bowl (school cleaner)<br><u>Glutaraldehyde</u><br>- disinfection of piggery with poor ventilation (farmer)<br><u>Hexamethylene diisocyanate</u><br>-fire from polyurethane insulation material (construction worker)<br><u>Naphthalene compounds</u><br>-washing and mangling sheets which were handled with naphthalene compounds (launderer)<br><u>Pyrethrin</u><br>-cleaning after bedbug control treatment without pre-ventilation (cleaner) | 1<br><u>Hexamethylene diisocyanate</u><br>-spray painting with malfunctioning respiratory protective device (painter)                                                                                                                                                                                                                                                          | 6 |

|          |                                                                                                                                                                                                                                                                                                                                                                                                                                                                                                                                                                                                                                                                                                                                                                                                                                                                                                           |                                                                                                                                                                                                                                                                                                                                                                                                                                                                                                                                                                                                                                                                                                                                                                                                                                                                                                                                                                                                                                                                                                                                                                                                                                                                                                                                                            |    |
|----------|-----------------------------------------------------------------------------------------------------------------------------------------------------------------------------------------------------------------------------------------------------------------------------------------------------------------------------------------------------------------------------------------------------------------------------------------------------------------------------------------------------------------------------------------------------------------------------------------------------------------------------------------------------------------------------------------------------------------------------------------------------------------------------------------------------------------------------------------------------------------------------------------------------------|------------------------------------------------------------------------------------------------------------------------------------------------------------------------------------------------------------------------------------------------------------------------------------------------------------------------------------------------------------------------------------------------------------------------------------------------------------------------------------------------------------------------------------------------------------------------------------------------------------------------------------------------------------------------------------------------------------------------------------------------------------------------------------------------------------------------------------------------------------------------------------------------------------------------------------------------------------------------------------------------------------------------------------------------------------------------------------------------------------------------------------------------------------------------------------------------------------------------------------------------------------------------------------------------------------------------------------------------------------|----|
| Mixtures | <p>6</p> <p><u>Sodium hydroxide, sodium hypochlorite</u><br/>-washing warm garage floor with alkaline cleaning agent with poor ventilation (car mechanic)</p> <p><u>Sulfuric acid, sodium hypochlorite, chlorine gas</u><br/>-mixing swimming pool chemicals incorrectly leading to generation of toxic fumes (caretaker at sports center)</p> <p><u>Combustion gas</u><br/>-rescue task in burning building (police officer)</p> <p><u>Nitric oxides, diesel exhaust, mixture of oil and water</u><br/>-performing work hygiene measurements in tunnel work (occupational hygienist)</p> <p><u>Bitumen, solvents and their thermal degradation products</u><br/>-doing bitumen insulation indoors with poor ventilation (insulation worker)</p> <p><u>Thermal degradation of polyester powder paint</u><br/>-due to inoperative washer, metal parts were overheated before powder painting (painter)</p> | <p>12</p> <p><u>Ammonia and hydrogen sulfide</u><br/>-emptying sludge in piggery (farmer)</p> <p><u>Ammonia, hydrogen sulfide and endotoxins</u><br/>- working in piggery (farm worker)</p> <p>-veneer log processing with chemicals to soften them (wheel loader)</p> <p><u>Hydrogen sulfide, sulfur compounds, sodium hydroxide, chlorine dioxide</u><br/>-process failure in pulp mill (field worker)</p> <p><u>Calcium oxide and hydrogen sulfide</u><br/>-Working in mine e.g. in calcium oxide storage and in metal sedimentation (machinery mechanic)</p> <p><u>Trifluoroacetic acid and acetonitrile</u><br/>-keeping cleaning agents in open bowls (research assistant)</p> <p><u>Formic acid, acetic acid, formaldehyde</u><br/>-working inside furnaces where wood was thermally modified (machinery mechanic)</p> <p><u>Solvents and mining dust</u><br/>-washing mining vehicles with solvents and pressured air (machinery repairer)</p> <p><u>Rubber chemicals and their thermal degradation products</u><br/>- weekly occurring fires from rubber material in production of rubber insulation (production worker)</p> <p><u>Thermal degradation of polyvinyl chloride (PVC)-coated fabrics</u><br/>-heat-seaming plastic-coated canvas with electric charge at 175 °C, poor ventilation (seamstress, foreman and manufacturing worker)</p> | 18 |
| Dusts    | <p>4</p> <p><u>Calcium oxide</u><br/>-emptying sacks of calcium oxide powder (stevedore)</p> <p><u>Calcium oxide</u><br/>-cleaning tank of calcium oxide powder with malfunctioning respiratory protective device (lorry driver)</p> <p><u>Cement</u><br/>-spraying of concrete coating in tunnel, poor ventilation (tunnel worker)</p> <p>-cement silo breakdown during loading (lorry driver)</p>                                                                                                                                                                                                                                                                                                                                                                                                                                                                                                       | <p>4</p> <p><u>Calcium oxide and alkaline dusts</u><br/>- sulfur removal of exhaust gases by calcium sludge (power plant operator)</p> <p><u>Cement</u><br/>-emptying sacks of cement (concrete layer)</p> <p><u>Ash</u><br/>-transporting alkaline ash in a power plant, 5 accidental exposures connected to silo brake-downs (packer)</p> <p><u>Sulfuric acid-coated titanium oxide powder</u><br/>-working in chemical plant (packer)</p>                                                                                                                                                                                                                                                                                                                                                                                                                                                                                                                                                                                                                                                                                                                                                                                                                                                                                                               | 8  |

|            |   |                                                                                                                                                                                                                                                                                                      |   |
|------------|---|------------------------------------------------------------------------------------------------------------------------------------------------------------------------------------------------------------------------------------------------------------------------------------------------------|---|
| Endotoxins | 0 | 4<br>-washing dough sludge and contaminated insulation in bioethanol plant (driver of industrial sweeper)<br>- transmitting malt in silo (worker in foodstuff company)<br>- washing process of potatoes in potato flour plant (operator)<br>- work in power plant using sod and woodchips (operator) | 4 |
|------------|---|------------------------------------------------------------------------------------------------------------------------------------------------------------------------------------------------------------------------------------------------------------------------------------------------------|---|

E-Table 2 Agents causing irritant asthma: identification details, occupational exposure limits and relevant (irritancy-related) hazard classifications according to current EU legislation.

| Chemical name        | Chemical formula                                 | CAS number                                    | OEL for 8 hours, (ppm if not marked otherwise)             | OEL for 15 min (ppm if not marked otherwise)       | Classification according to CLP                                               |
|----------------------|--------------------------------------------------|-----------------------------------------------|------------------------------------------------------------|----------------------------------------------------|-------------------------------------------------------------------------------|
| Acids                |                                                  |                                               |                                                            |                                                    |                                                                               |
| Sulfuric acid        | H <sub>2</sub> SO <sub>4</sub>                   | 7664-93-9                                     | 0.05 mg/m <sup>3</sup>                                     | 0.1 mg/m <sup>3</sup>                              | Skin Corr 1A                                                                  |
| Sulfurous acid       | H <sub>2</sub> SO <sub>3</sub>                   | 7782-99-2                                     | NA                                                         | NA                                                 | Skin Corr 1B                                                                  |
| Hydrochloric acid    | HCl                                              | 7647-01-0                                     | NA                                                         | 5 (7.6 mg/m <sup>3</sup> )                         | Skin Corr 1A                                                                  |
| Nitric acid          | HNO <sub>3</sub>                                 | 7697-37-2                                     | 0.5 (1.3 mg/m <sup>3</sup> )                               | 1 (2.6 mg/m <sup>3</sup> )                         | Skin Corr 1A<br>Ox. Liq. 2                                                    |
| Hydrofluoric acid    | HF                                               | 7664-39-3                                     | 1.8 (1.5 mg/m <sup>3</sup> )                               | 3 (2.5 mg/m <sup>3</sup> )                         | Skin Corr 1A                                                                  |
| Formic acid          | HCOOH                                            | 64-18-6                                       | 3 (5 mg/m <sup>3</sup> )                                   | 10 (19 mg/m <sup>3</sup> )                         | Skin Corr 1A                                                                  |
| Acetic acid          | CH <sub>3</sub> COOH                             | 64-19-7                                       | 5 (13 mg/m <sup>3</sup> )                                  | 10 (25 mg/m <sup>3</sup> )                         | Skin Corr 1A                                                                  |
| Trifluoroacetic acid | CF <sub>3</sub> COOH                             | 76-05-1                                       | NA                                                         | NA                                                 | Skin Corr 1A                                                                  |
| Bases                |                                                  |                                               |                                                            |                                                    |                                                                               |
| Ammonia              | NH <sub>3</sub>                                  | 1336-21-6                                     | 20 (14 mg/m <sup>3</sup> )                                 | 50 (36 mg/m <sup>3</sup> )                         | Skin Corr 1B                                                                  |
| Sodium hydroxide     | NaOH                                             | 1310-73-2                                     | NA                                                         | 2 mg/m <sup>3</sup>                                | Skin Corr 1A                                                                  |
| Potassium hydroxide  | KOH                                              | 1310-58-3                                     | NA                                                         | 2 mg/m <sup>3</sup>                                | Skin Corr 1A                                                                  |
| Irritant gases       |                                                  |                                               |                                                            |                                                    |                                                                               |
| Sulfur dioxide       | SO <sub>2</sub>                                  | 7446-09-5                                     | 0.5 (1.3 mg/m <sup>3</sup> )                               | 1 (2.7 mg/m <sup>3</sup> )                         | Skin Corr 1B                                                                  |
| Chlorine             | Cl <sub>2</sub>                                  | 7782-50-5                                     | NA                                                         | 0.5 (1.5 mg)                                       | Ox. Gas 1<br>Skin Irrit 2                                                     |
| Chlorine dioxide     | ClO <sub>2</sub>                                 | 10049-04-4                                    | 0.1 (0.28 mg/m <sup>3</sup> )                              | 0.3 (0.84 mg/m <sup>3</sup> )                      | Ox. Gas 1<br>Skin Corr 1B                                                     |
| Hydrogen sulfide     | H <sub>2</sub> S                                 | 7783-06-4                                     | 5 (7 mg/m <sup>3</sup> )                                   | 10 (14 mg/m <sup>3</sup> )                         | Acute Tox 2 <sup>a</sup>                                                      |
| Nitrogen oxides      | NO <sub>x</sub> (e.g. NO, NO <sub>2</sub> )      | NO: 10102-43-9<br>NO <sub>2</sub> :10102-44-0 | 10 (12.5 mg/m <sup>3</sup> )<br>1 (1.9 mg/m <sup>3</sup> ) | NO: NA<br>NO <sub>2</sub> : 2 (mg/m <sup>3</sup> ) | NO: Skin Corr 1B <sup>b</sup><br>NO <sub>2</sub> : Ox. Gas 1,<br>Skin Corr 1B |
| Other                |                                                  |                                               |                                                            |                                                    |                                                                               |
| Hydrogen peroxide    | H <sub>2</sub> O <sub>2</sub>                    | 7722-84-1                                     | 1 (1.4 mg/m <sup>3</sup> )                                 | 3 (4.2 mg/m <sup>3</sup> )                         | Ox. Liq 1<br>Skin Corr 1A                                                     |
| Ozone                | O <sub>3</sub>                                   | 10028-15-6                                    | 0.05 (0.1 mg/m <sup>3</sup> )                              | 0.2 (0.4 mg/m <sup>3</sup> )                       | Ox. Gas 1 <sup>b</sup><br>Skin Corr 1B <sup>b</sup>                           |
| Isocyanates          | -NCO <sup>c</sup>                                | various                                       | NA                                                         | 0.035 mg/m <sup>3c</sup>                           | Skin Corr 1C <sup>b</sup>                                                     |
| Formaldehyde         | HCHO                                             | 50-00-0                                       | 0.3 (0.37 mg/m <sup>3</sup> )                              | 1 (1.2 mg/m <sup>3</sup> )                         | Skin Corr 1B                                                                  |
| Glutaraldehyde       | C <sub>3</sub> H <sub>6</sub> (CHO) <sub>2</sub> | 111-30-8                                      |                                                            | 0.1 (0.42 mg/m <sup>3</sup> )                      | Skin Corr 1B<br>(Resp Sens 1)                                                 |
| Sodium hypochlorite  | NaClO                                            | 7681-52-9                                     | NA                                                         | NA                                                 | Skin Corr 1B                                                                  |

|                   |                              |                              |                                   |    |                                                                |
|-------------------|------------------------------|------------------------------|-----------------------------------|----|----------------------------------------------------------------|
| Ammonium Fluoride | NH <sub>4</sub> F            | 12125-01-8                   | NA                                | NA | Skin Corr 1C <sup>b</sup>                                      |
| Inorganic dust    | can be any, and be a mixture | can be any, and be a mixture | 10 mg/m <sup>3</sup>              | NA | hazard evaluation must be based on the composition of the dust |
| Endotoxins        | -                            | -                            | 90 EU/m <sup>3</sup> <sup>d</sup> | NA | -                                                              |

OEL= Finnish occupational exposure limit, NA=not available, CLP= The Classification, Labelling and Packaging Regulation (EC No 1272/2008)

<sup>a</sup> E.g. systemic and neurological effects, locally pulmonary edema

<sup>b</sup> Unharmonized classification

<sup>c</sup> Isocyanate (-NCO) groups of any isocyanate compounds

<sup>d</sup> Dutch OEL

E-Table 3. Workplace measurements in cases where available and relevant for assessment of exposure to irritant factors, and remarks on exposure. Some measurements were conducted by a trained occupational hygienist and some by respective company's own follow-up.

| Workplace or process  | Specific work process with high level of exposure   | Substance measured                                              | Mean air concentration in ppm, if not given otherwise (% of 8h-OEL) <sup>a</sup> | Maximum air concentration in ppm, if not given otherwise (% of 8h-OEL) <sup>a</sup> | Remarks                                                                                                                                                                             |
|-----------------------|-----------------------------------------------------|-----------------------------------------------------------------|----------------------------------------------------------------------------------|-------------------------------------------------------------------------------------|-------------------------------------------------------------------------------------------------------------------------------------------------------------------------------------|
| Piggery I             | Sludge handling, piglet department and open shed    | Ammonia (NH <sub>3</sub> )                                      | 6.6 (33)                                                                         | 37 (187)                                                                            | Direct-reading device; generally poor workplace hygiene and ventilation; measurements taken after cleaning and additional ventilation, which possibly underestimates real situation |
|                       |                                                     | Hydrogen sulfide (H <sub>2</sub> S)                             | NA                                                                               | 4 (80)                                                                              |                                                                                                                                                                                     |
|                       |                                                     | Endotoxins                                                      | 9500 EU/m <sup>3</sup> (10500)                                                   | NA                                                                                  |                                                                                                                                                                                     |
| Piggery II            | Farrowing department, sludge handling and open shed | Ammonia (NH <sub>3</sub> )                                      | 1.1–16 mg/m <sup>3</sup> (9–114)                                                 | NA                                                                                  | Poor ventilation in several departments                                                                                                                                             |
|                       |                                                     | Hydrogen sulfide (H <sub>2</sub> S)                             | >2.5 (50)                                                                        | 14 (280)                                                                            |                                                                                                                                                                                     |
| Cowshed               | Cleaning and emptying sludge pipe and basin         | Ammonia (NH <sub>3</sub> )                                      | 10–20 (50–100)                                                                   | 214 (>1000)                                                                         | Direct-reading device; high levels of ammonia also in everyday animal care                                                                                                          |
|                       |                                                     | Hydrogen sulfide (H <sub>2</sub> S)                             | 5 (100)                                                                          | 20 (400)                                                                            |                                                                                                                                                                                     |
| Poultry rearing house | Inspection and occupational hygiene measurement     | Ammonia (NH <sub>3</sub> )                                      | 60–80 (300–400)                                                                  | NA                                                                                  | Direct-reading device measurement over one-hour inspection visit                                                                                                                    |
| Meat packing          | Packing chicken meat and cleaning packing line      | Ammonia (NH <sub>3</sub> )                                      | 10–150 (50–750)                                                                  | 260 (1300)                                                                          | Online gas detector at workplace; high concentrations detected during 2 months with problems in cleaning system, including two larger ammonia leaks with especially high exposure   |
| pudding production    | Long-lasting and repeated high                      | Hydrogen peroxide (H <sub>2</sub> O <sub>2</sub> ) <sup>b</sup> | 1.1 (110)                                                                        | 4.4 (440)                                                                           | Online gas detector at workplace;                                                                                                                                                   |

|                                     |                                                                                                          |                                                  |                                                 |                   |                                                                                                                                                                                                                                                                                                                                                                                   |
|-------------------------------------|----------------------------------------------------------------------------------------------------------|--------------------------------------------------|-------------------------------------------------|-------------------|-----------------------------------------------------------------------------------------------------------------------------------------------------------------------------------------------------------------------------------------------------------------------------------------------------------------------------------------------------------------------------------|
|                                     | exposure in normal work                                                                                  |                                                  |                                                 |                   | several workers had experienced respiratory irritation; bleaching of hair and eyebrows was observed                                                                                                                                                                                                                                                                               |
| Potato flour factory                | Washing potatoes                                                                                         | Endotoxins                                       | 1900 EU/m <sup>3</sup> (2100)                   | NA                | Occasional exposure also to alkaline washing agents                                                                                                                                                                                                                                                                                                                               |
| Foodstuff production                | Handling malt                                                                                            | Endotoxins                                       | 25 000 EU/m <sup>3</sup> (28 000)               | NA                | Extremely dusty work handling malt of several different grains                                                                                                                                                                                                                                                                                                                    |
| Electroplating                      | High exposure to acid fumes and nickel especially during night shifts when air conditioning switched off | Nickel in air (Ni)                               | 0.095 mg/m <sup>3</sup> (950)                   | NA                | Two cases working in same shift; biomonitoring of nickel in one revealed high exposure 1–2 days previously, which was used as marker of exposure to all air impurities; the main cause of asthma in both cases was considered to be acid fumes that were visible especially in the night shift; airborne nickel was measured months later during a day shift with ventilation on. |
|                                     |                                                                                                          | Nickel in urine (biomonitoring)                  | U-Ni 2.2 mmol/l (170)                           | NA                |                                                                                                                                                                                                                                                                                                                                                                                   |
| Hot-zinc coating plant              | Work near acid baths and hot zinc-coating fumes                                                          | Hydrochloric acid (HCl)                          | 0.78–6.4 mg/m <sup>3</sup> (10–84) <sup>c</sup> | NA                | Mean HCl levels that represent exposure over a working day were near the short-term OEL, thus exposure was excessive                                                                                                                                                                                                                                                              |
|                                     |                                                                                                          | Formaldehyde (CH <sub>2</sub> O)                 | 0.324 (108)                                     | NA                |                                                                                                                                                                                                                                                                                                                                                                                   |
| Metal production plant              | Working nearby wet precipitation processes utilizing hydrogen sulfide                                    | Hydrogen sulfide (H <sub>2</sub> S) <sup>b</sup> | repeatedly >10 (200)                            | NA                | Hydrogen sulfide was monitored by online gas detectors at the workplace; the main causes of asthma were considered to be hydrogen sulfide and sulfuric acid evaporating from process lines; acids were not measured                                                                                                                                                               |
| Copper and nickel smelters (abroad) | Maintenance campaigns in several old-fashioned copper and nickel smelters abroad                         | Sulfur dioxide (SO <sub>2</sub> ) <sup>b</sup>   | NA                                              | 40–120 (800–2400) | Online gas detector at workplace; generally poor workplace hygiene in many places; sulfur dioxide the main emission in copper smelters                                                                                                                                                                                                                                            |

|                  |                                                                                                                 |                                                   |                                        |                                       |                                                                                                                                                                                                                                                 |
|------------------|-----------------------------------------------------------------------------------------------------------------|---------------------------------------------------|----------------------------------------|---------------------------------------|-------------------------------------------------------------------------------------------------------------------------------------------------------------------------------------------------------------------------------------------------|
| Metal mine       | Working above precipitation tank where H <sub>2</sub> S gas was bubbled through metal solutions                 | Hydrogen sulfide (H <sub>2</sub> S) <sup>b</sup>  | NA                                     | weekly >20 (>400)                     | Online gas detector alarms were set to 20 ppm H <sub>2</sub> S which is 4 x OEL; irritant and toxic H <sub>2</sub> S gas and alkaline CaO powder (dust) were thought to be the main causes of asthma                                            |
|                  | Loading calcium oxide (CaO) powder                                                                              | Dust (alkaline)                                   | >30 mg/m <sup>3</sup> (>300)           | NA                                    |                                                                                                                                                                                                                                                 |
| Chemical plant   | Process work at different stages of sulfuric acid production                                                    | Sulfur dioxide (SO <sub>2</sub> )                 | 0.6–2.98 mg/m <sup>3</sup> (46–230)    | 1.5–13.4 mg/m <sup>3</sup> (115–1040) | Direct-reading device; Gas leaks increasingly detected due to corroded process lines; sulfuric acid and hydrogen sulfide followed by online gas detectors but measurement data not available                                                    |
| Fertilizer plant | Cleaning process blockages with high-pressure-cleaner and chipping hammer                                       | Hydrofluoric acid (HF)                            | 0.45–8.7 mg/m <sup>3</sup> (30–580)    | NA                                    | Several corrosive agents (acids, bases, hydrogen sulfide and oxides); occasional very high exposure peaks exceeding capacity of online gas detectors at workplace. Exposed despite relevant respiratory protective equipment.                   |
|                  |                                                                                                                 | Phosphoric acid (H <sub>3</sub> PO <sub>4</sub> ) | 0.14–0.51 mg/m <sup>3</sup> (14–51)    | NA                                    |                                                                                                                                                                                                                                                 |
|                  |                                                                                                                 | Sulfuric acid (H <sub>2</sub> SO <sub>4</sub> )   | 0.034–0.068 mg/m <sup>3</sup> (68–136) | NA                                    |                                                                                                                                                                                                                                                 |
| Chemical plant   | Packing titanium dioxide (TiO <sub>2</sub> ) powder coated with sulfuric acid (H <sub>2</sub> SO <sub>4</sub> ) | Dust (acidic)                                     | 16.9 mg/m <sup>3</sup> (169)           | 71.8 mg/m <sup>3</sup> (718)          | Heavy exposure to dust; one of the main products was coated with H <sub>2</sub> SO <sub>4</sub> , which was the main reason for asthma; also nasal and eye irritation, chronic rhinosinusitis and nasolacrimal duct stenosis due to acidic dust |
| Bioethanol plant | 3-day-period cleaning large area of biomass and contaminated insulation                                         | Endotoxins                                        | 0.26–340 EU/m <sup>3</sup>             | NA                                    | Measurements taken in normal situation and thought to underestimate the exposure during discharging and cleaning period                                                                                                                         |
| Pulp mill I      | Handling process disturbances in pulp                                                                           | Hydrogen sulfide (H <sub>2</sub> S) <sup>b</sup>  | daily >5 (>100)                        | NA                                    | Online gas detectors at workplace                                                                                                                                                                                                               |

|                              |                                                                                                    |                                                  |                                    |                              |                                                                                                                                                                                                                                                                                                       |
|------------------------------|----------------------------------------------------------------------------------------------------|--------------------------------------------------|------------------------------------|------------------------------|-------------------------------------------------------------------------------------------------------------------------------------------------------------------------------------------------------------------------------------------------------------------------------------------------------|
|                              | digester and bleaching unit                                                                        | Chlorodioxide (ClO <sub>2</sub> ) <sup>b</sup>   | daily >0.1 (>100)                  | 0.93 (930)                   |                                                                                                                                                                                                                                                                                                       |
| Pulp mill I, outside         | Handling wood chip raw material outside and in storage tunnel                                      | Hydrogen sulfide (H <sub>2</sub> S) <sup>b</sup> | 7 (140)                            | NA                           | Two high exposure occasions: first outside plant when cloud of H <sub>2</sub> S and ClO <sub>2</sub> from the process reached the patients' working area, another was a week later when working in a storage tunnel with high levels of H <sub>2</sub> S, as detected by personal online gas detector |
| Pulp mill II                 | Process leak of ClO <sub>2</sub> solution into open channel on floor                               | Chlorodioxide (ClO <sub>2</sub> ) <sup>b</sup>   | 0.69 (690)                         | NA                           | Personal online gas detector; one occasion of high exposure                                                                                                                                                                                                                                           |
| Power plant I                | Accidents such as collapse of 150–300-ton silo when loading ash                                    | Dust (alkaline)                                  | 3.4 mg/m <sup>3</sup> (34)         | NA                           | Alkaline ash dust considered to be main reason for asthma; dust measurements taken in normal work but accidents represent very high exposure levels; 5–6 accidents/five years' employment                                                                                                             |
| Power plant II               | Opening wood chip tanks in connection with process disturbances                                    | Endotoxins                                       | 1500 EU/m <sup>3</sup> (1700)      | NA                           | Repeated high-level exposure to endotoxins over several years                                                                                                                                                                                                                                         |
| Tunnel construction          | Concentration of diesel exhaust from tunnel cleaning machine due to ventilation being switched off | Nitrogen oxides (NO <sub>x</sub> ) <sup>b</sup>  | >100 (400) <sup>d</sup>            | NA                           | Online gas detector for all nitrogen oxides at workplace                                                                                                                                                                                                                                              |
| Thermal preservation of wood | A period with technical problems due to which wool piles had to be moved by hand into drying oven  | Formaldehyde (CH <sub>2</sub> O)                 | 0.03–0.19 mg/m <sup>3</sup> (8–51) | 0.56 mg/m <sup>3</sup> (150) | Moderate levels of formaldehyde, organic acids and VOC measured in general air outside ovens; concentration was thought to be multiple inside ovens where the patient worked without respiratory protection for 2–6 hours/day over a 9-month period                                                   |
|                              |                                                                                                    | Acetic acid (CH <sub>3</sub> COOH)               | 0.91–7.15 mg/m <sup>3</sup> (7–55) | NA                           |                                                                                                                                                                                                                                                                                                       |
|                              |                                                                                                    | Formic acid (HCOOH)                              | 0.4–1.2 mg/m <sup>3</sup> (8–24)   | NA                           |                                                                                                                                                                                                                                                                                                       |

|                                      |                                                                          |                                                  |                                 |                             |                                                                                                                                                                                                                               |
|--------------------------------------|--------------------------------------------------------------------------|--------------------------------------------------|---------------------------------|-----------------------------|-------------------------------------------------------------------------------------------------------------------------------------------------------------------------------------------------------------------------------|
|                                      |                                                                          | Terpenes (wood VOC)                              | 4.2–21 mg/m <sup>3</sup> (3–15) | 218 mg/m <sup>3</sup> (156) |                                                                                                                                                                                                                               |
| Veneer log processing with chemicals | Working in log incubator plant                                           | Hydrogen sulfide (H <sub>2</sub> S) <sup>b</sup> | NA                              | 20–60 (400–1200)            | Online gas detectors at workplace; removal of sludge from incubator wastewater located nearby, this was thought to be the main source of hydrogen sulfide                                                                     |
| Processing PVC- fabrics              | Heat seaming of large PVC-impregnated fabrics; air conditioning problems | Total VOC                                        | 3–5 mg/m <sup>3</sup>           | 6.5 mg/m <sup>3</sup>       | Three asthma cases in seaming of PVC at 175 °C; measurements were taken several months after the breakout with normal air conditioning on; also several non- or mildly irritant agents were discovered in low concentrations. |

OEL=occupational exposure limit, ppm=parts per million, NA=not available, EU=endotoxin unit, VOC= volatile organic compounds, PVC=polyvinyl chloride

<sup>a</sup> Finnish OEL and if not set, other relevant European OEL

<sup>b</sup> Measurements from company's own follow-up with on-line gas detectors

<sup>c</sup> Only short-term (15 min) OEL set

<sup>d</sup> Company-defined exposure limit for total oxides of nitrogen was 25 mg/m<sup>3</sup>
